# Supplementary material for: Peripheral skin cooling during hyper-gravity: hemodynamic reactions
Source: Frontiers journal article supplement (doi:10.3389/fphys.2023.1173171), 2023-05-15
Supplement: Data_Sheet_1.pdf [file Data_Sheet_1.pdf]

**TABLE S1. Cardiovascular data.** Means  $\pm$  SD of Baseline data and absolute values of heart rate (HR), stroke volume (SV), total peripheral resistance (TPR) and cardiac output (CO) in the cooling protocol (CP) group and the non-cooling protocol (NCP) group with respect to different phases. Numbers of subjects, included in analysis, in each phase and parameter are indicated as “n”.

| Phases           | HR [bpm]                                       | n [HR] | SV [ml]                                     | TPR [mmHg*min/L]                        | CO [L]                                  | n [SV, CO, TPR] |
|------------------|------------------------------------------------|--------|---------------------------------------------|-----------------------------------------|-----------------------------------------|-----------------|
| Baseline         | CP: 71.5 $\pm$ 11<br>NCP: 71.9 $\pm$ 10.4      | 17     | CP: 73 $\pm$ 13.4<br>NCP: 73.6 $\pm$ 13.7   | CP: 1.2 $\pm$ 0.3<br>NCP: 1.2 $\pm$ 0.3 | CP: 5.2 $\pm$ 0.9<br>NCP: 5.3 $\pm$ 1   | 16              |
| 0G-1G (P1)       | CP: 83.8 $\pm$ 16<br>NCP: 80.1 $\pm$ 13.8      | 17     | CP: 87.3 $\pm$ 18.1<br>NCP: 88.2 $\pm$ 14.8 | CP: 0.8 $\pm$ 0.2<br>NCP: 0.8 $\pm$ 0.2 | CP: 7.2 $\pm$ 1.9<br>NCP: 7 $\pm$ 1.5   | 16              |
| last 60s 1G (P2) | CP: 74.2 $\pm$ 12.5<br>NCP: 76 $\pm$ 13.8      | 17     | CP: 75.7 $\pm$ 17.4<br>NCP: 74.3 $\pm$ 13   | CP: 1.1 $\pm$ 0.2<br>NCP: 1.1 $\pm$ 0.2 | CP: 5.5 $\pm$ 1.3<br>NCP: 5.5 $\pm$ 0.9 | 16              |
| 1G-2G (P3)       | CP: 84.9 $\pm$ 14.6<br>NCP: 88.5 $\pm$ 15.6    | 17     | CP: 59.4 $\pm$ 14.5<br>NCP: 57.2 $\pm$ 11.4 | CP: 1.4 $\pm$ 0.4<br>NCP: 1.5 $\pm$ 0.4 | CP: 4.9 $\pm$ 1.1<br>NCP: 4.9 $\pm$ 0.9 | 16              |
| last 60s 2G (P4) | CP: 98.6 $\pm$ 20.7<br>NCP: 103.4 $\pm$ 21.2   | 17     | CP: 46.2 $\pm$ 9.8<br>NCP: 44.2 $\pm$ 11.4  | CP: 1.7 $\pm$ 0.3<br>NCP: 1.7 $\pm$ 0.4 | CP: 4.5 $\pm$ 0.7<br>NCP: 4.4 $\pm$ 0.8 | 16              |
| 2G-3G (P5)       | CP: 114.7 $\pm$ 23.6<br>NCP: 119 $\pm$ 22      | 16     | CP: 35.5 $\pm$ 9.1<br>NCP: 34.8 $\pm$ 8.1   | CP: 2.2 $\pm$ 0.6<br>NCP: 2.1 $\pm$ 0.5 | CP: 3.8 $\pm$ 0.9<br>NCP: 3.9 $\pm$ 0.7 | 14              |
| last 60s 3G (P6) | CP: 129.3 $\pm$ 22<br>NCP: 136.17 $\pm$ 22.5   | 8      | CP: 34.7 $\pm$ 2.8<br>NCP: 28.1 $\pm$ 7     | CP: 2.1 $\pm$ 0.5<br>NCP: 2.5 $\pm$ 0.7 | CP: 4 $\pm$ 0.6<br>NCP: 3.4 $\pm$ 0.8   | 5               |
| 3G-4G (P7)       | CP: 142.5 $\pm$ 15.9<br>NCP: 148.03 $\pm$ 22.5 | 6      | CP: 22.1 $\pm$ 3<br>NCP: 23.7 $\pm$ 6.1     | CP: 3.8 $\pm$ 0.3<br>NCP: 3.6 $\pm$ 1.7 | CP: 2.7 $\pm$ 0.3<br>NCP: 2.9 $\pm$ 1.1 | 2               |

**TABLE S2. Linear mixed model of heart rate.** Estimates, standard error (Std.-error), significance (Sig), and confidence interval 95% (CI 95%) from the linear mixed model of heart rate (HR) adjusted to the protocol relating to different phases of the +Gz-protocol. Cooling (CP)/non-cooling (NCP) protocol groups regarded as fixed effects and individual subjects as random effects. Estimates of HR are given as differences to baseline. The terms [phase] relate to differences to baseline in NCP and express if SAHC forces have an effect to illustrated HR regardless cooling. The terms [CP\*phase] indicate the differences in HR in the CP compared to NCP during different phases. [CP\*phase] reveals if changes in HR are only based on effects of SAHC or even on cooling effects. If cooling effects were present, this would be reflected in significant values in [CP\*phase].

| Parameter        | Estimates of HR [beats/min] | Std.-Error | Sig.   | CI 95% - lower limit | CI 95% - upper limit |
|------------------|-----------------------------|------------|--------|----------------------|----------------------|
| [phase=1]        | 8                           | 3.90       | 0.037  | 0                    | 16                   |
| [phase=2]        | 4                           | 3.90       | 0.298  | -4                   | 12                   |
| [phase=3]        | 17                          | 3.90       | <0.001 | 9                    | 24                   |
| [phase=4]        | 31                          | 3.90       | <0.001 | 24                   | 39                   |
| [phase=5]        | 49                          | 3.96       | <0.001 | 41                   | 56                   |
| [phase=6]        | 72                          | 4.90       | <0.001 | 62                   | 81                   |
| [phase=7]        | 83                          | 5.44       | <0.001 | 73                   | 94                   |
|                  |                             |            |        |                      |                      |
| [CP] * [phase=1] | 4                           | 5.52       | 0.452  | -7                   | 15                   |
| [CP] * [phase=2] | -1                          | 5.52       | 0.812  | -12                  | 10                   |
| [CP] * [phase=3] | -3                          | 5.52       | 0.558  | -14                  | 8                    |
| [CP] * [phase=4] | -4                          | 5.52       | 0.429  | -15                  | 6                    |
| [CP] * [phase=5] | -4                          | 5.60       | 0.452  | -15                  | 7                    |
| [CP] * [phase=6] | -7                          | 6.93       | 0.310  | -21                  | 7                    |
| [CP] * [phase=7] | -5                          | 7.69       | 0.493  | -20                  | 10                   |

**TABLE S3. Linear mixed model of stroke volume.** Estimates, standard error (Std.-error), significance (Sig), and confidence interval 95% (CI 95%) from linear mixed model of stroke volume (SV), adjusted to the protocol related to different phases of the +Gz-protocol. Cooling (CP)/non-cooling (NCP) protocol groups regarded as fixed effects and individual subjects as random effects. Estimates of SV are given as differences to baseline. The terms [phase] relate to differences to baseline in NCP and express if SAHC forces have an effect to illustrated SV regardless cooling. The terms [CP\*phase] indicate the differences in SV in the CP compared to NCP during different phases. [CP\*phase] reveals if changes in SV are only based on effects of SAHC or even on cooling effects. If cooling effects were present, this would be reflected in significant values in [CP\*phase].

| Parameter        | Estimates of SV [ml] | Std.-Error | Sig.   | CI 95% - lower limit | CI 95% - upper limit |
|------------------|----------------------|------------|--------|----------------------|----------------------|
| [phase=1]        | 14.66                | 2.95       | <0.001 | 8.83                 | 20.49                |
| [phase=2]        | 0.73                 | 2.95       | 0.804  | -5.10                | 6.56                 |
| [phase=3]        | -16.36               | 2.95       | <0.001 | -22.19               | -10.53               |
| [phase=4]        | -29.36               | 2.95       | <0.001 | -35.18               | -23.53               |
| [phase=5]        | -41.78               | 3.06       | <0.001 | -47.81               | -35.75               |
| [phase=6]        | -46.92               | 4.28       | <0.001 | -55.37               | -38.47               |
|                  |                      |            |        |                      |                      |
| [CP] * [phase=1] | -0.35                | 4.18       | 0.934  | -8.59                | 7.90                 |
| [CP] * [phase=2] | 1.97                 | 4.18       | 0.638  | -6.28                | 10.21                |
| [CP] * [phase=3] | 2.75                 | 4.18       | 0.511  | -5.49                | 10.99                |
| [CP] * [phase=4] | 2.59                 | 4.18       | 0.536  | -5.65                | 10.84                |
| [CP] * [phase=5] | 1.21                 | 4.33       | 0.780  | -7.32                | 9.74                 |
| [CP] * [phase=6] | 5.90                 | 6.06       | 0.331  | -6.04                | 17.85                |

**TABLE S4. Linear mixed model of cardiac output.** Estimates, standard error (Std.-error), significance (Sig), and confidence interval 95% (CI 95%) from linear mixed model of cardiac output (CO), adjusted to the protocol related to different phases of the +Gz-protocol. Cooling (CP)/non-cooling (NCP) protocol groups regarded as fixed effects and individual subjects as random effects. Estimates of CO are given as differences to baseline. The terms [phase] relate to differences to baseline in NCP and express if SAHC forces have an effect to illustrated CO regardless cooling. The terms [CP\*phase] indicate the differences in CO in the CP compared to NCP during different phases. [CP\*phase] reveals if changes in CO are only based on effects of SAHC or even on cooling effects. If cooling effects were present, this would be reflected in significant values in [CP\*phase].

| Parameter        | Estimates of CO [L/min] | Std.-Error | Sig.   | CI 95% - lower limit | CI 95% - upper limit |
|------------------|-------------------------|------------|--------|----------------------|----------------------|
| [phase=1]        | 1.49                    | 0.30       | 0.000  | 0.90                 | 2.08                 |
| [phase=2]        | 0.26                    | 0.30       | 0.378  | -0.32                | 0.85                 |
| [phase=3]        | -0.42                   | 0.30       | 0.163  | -1.00                | 0.17                 |
| [phase=4]        | -0.89                   | 0.30       | 0.003  | -1.48                | -0.30                |
| [phase=5]        | -1.48                   | 0.31       | <0.001 | -2.09                | -0.87                |
| [phase=6]        | -1.45                   | 0.43       | 0.001  | -2.30                | -0.59                |
|                  |                         |            |        |                      |                      |
| [CP] * [phase=1] | 0.25                    | 0.42       | 0.548  | -0.58                | 1.08                 |
| [CP] * [phase=2] | 0.08                    | 0.42       | 0.846  | -0.75                | 0.91                 |
| [CP] * [phase=3] | 0.15                    | 0.42       | 0.727  | -0.68                | 0.98                 |
| [CP] * [phase=4] | 0.15                    | 0.42       | 0.719  | -0.68                | 0.98                 |
| [CP] * [phase=5] | -0.08                   | 0.44       | 0.855  | -0.94                | 0.78                 |
| [CP] * [phase=6] | 0.56                    | 0.61       | 0.360  | -0.64                | 1.76                 |

**TABLE S5. Linear mixed model of total peripheral resistance.** Estimates, standard error (Std.-error), significance (Sig), and confidence interval 95% (CI 95%) from linear mixed model of total peripheral resistance (TPR), adjusted to the protocol related to different phases of the +Gz-protocol. Cooling (CP)/non-cooling (NCP) protocol groups regarded as fixed effects and individual subjects as random effects. Estimates of TPR are given as differences to baseline. The terms [phase] relate to differences to baseline in NCP and express if SAHC forces have an effect to illustrated TPR regardless cooling. The terms [CP\*phase] indicate the differences in TPR in the CP compared to NCP during different phases. [CP\*phase] reveals if changes in TPR are only based on effects of SAHC or even on cooling effects. If cooling effects were present, this would be reflected in significant values in [CP\*phase].

| Parameter | Estimates of TPR [mmHg*min/L] | Std.-Error | Sig.   | CI 95% - lower limit | CI 95% - upper limit |
|-----------|-------------------------------|------------|--------|----------------------|----------------------|
| [phase=1] | -0.36                         | 0.10       | 0.001  | -0.57                | -0.16                |
| [phase=2] | -0.07                         | 0.10       | 0.496  | -0.28                | 0.13                 |
| [phase=3] | 0.27                          | 0.10       | 0.010  | 0.06                 | 0.48                 |
| [phase=4] | 0.53                          | 0.10       | <0.001 | 0.32                 | 0.73                 |
| [phase=5] | 0.97                          | 0.11       | <0.001 | 0.75                 | 1.18                 |

|                  |       |      |        |       |      |
|------------------|-------|------|--------|-------|------|
| [phase=6]        | 1.18  | 0.15 | <0.001 | 0.88  | 1.48 |
| [CP] * [phase=1] | -0.02 | 0.15 | 0.876  | -0.31 | 0.27 |
| [CP] * [phase=2] | 0.01  | 0.15 | 0.953  | -0.28 | 0.30 |
| [CP] * [phase=3] | -0.01 | 0.15 | 0.956  | -0.30 | 0.28 |
| [CP] * [phase=4] | -0.05 | 0.15 | 0.719  | -0.34 | 0.24 |
| [CP] * [phase=5] | 0.13  | 0.15 | 0.388  | -0.17 | 0.43 |
| [CP] * [phase=6] | -0.26 | 0.21 | 0.233  | -0.68 | 0.17 |

**Figure S1. Short-arm human centrifuge at the DLR** (German Aerospace Center, Institute of Aerospace Medicine, Cologne, Germany). Our study was performed with only one subject in the centrifuge.

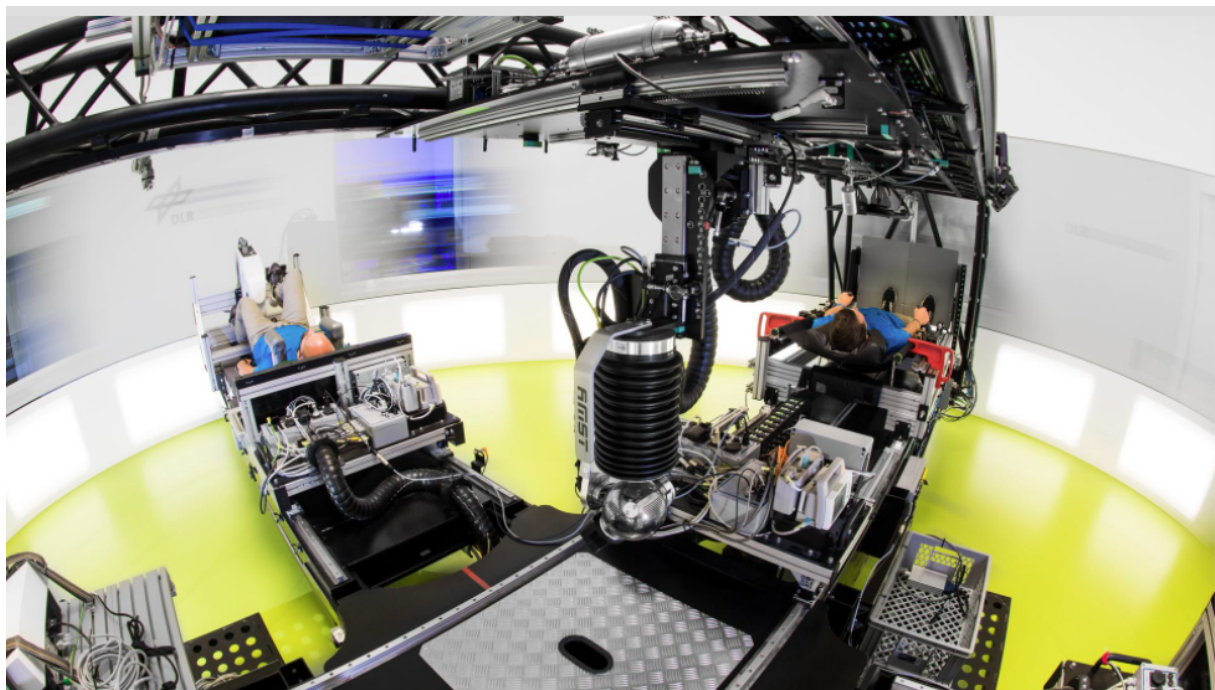

Homepage of DLR. (<https://www.dlr.de/content/de/grossforschungsanlagen/dlr-kurzarm-zentrifuge.html>)

**Figure S2. Cooling pads of the Artic Sun™.** Cold water (8°C) run through these blue tubes into the pads and cool down the skin to 8°C.

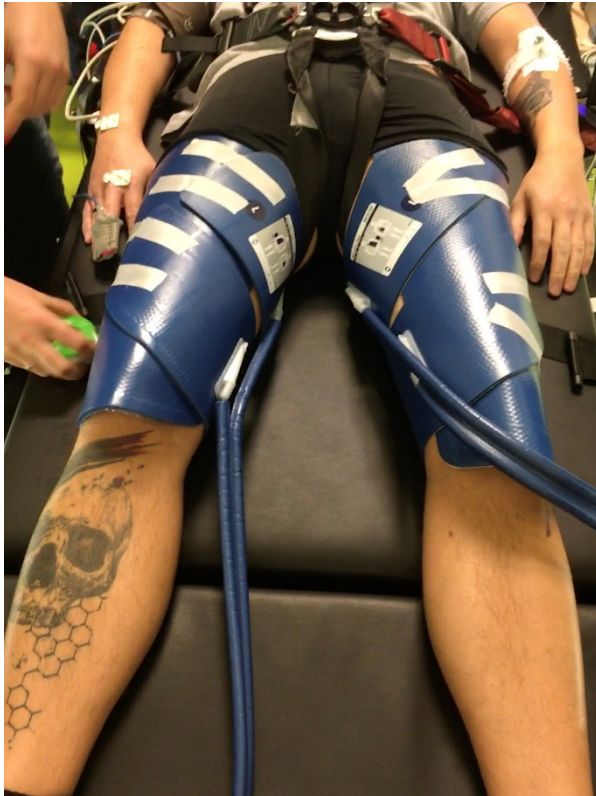

*Photo source: Niklas Kagelmann.*
